# Supplementary material for: “He told me my pain was in my head”: mitigating testimonial injustice through peer support
Source: PubMed Central journal article supplement (PMC10239879; doi:10.3389/fpain.2023.1125963), 2023-05-22
Supplement: Datasheet1.pdf [file Datasheet1.pdf]

## Interview Guide

1. Tell me about yourself.
  - Can you tell me the story of how you were diagnosed?
  - How did that feel? / How did you feel in that moment?
  - How has your life been since then?
  
2. Does scoliosis interfere with your social life? Friends, family, hobbies, colleagues, teachers...
  - Does it keep you from seeing your friends?
  - Do your friends treat you differently now than before?
  - Do your friends treat you differently than their other friends?
  - Does it make it harder for you to make new friends?
  - Does it keep you from doing things you like?
  - Do you usually tell people about it, or do you prefer to keep it to yourself?
  - How did it affect your family life?
  - Is it harder to do family activities?
  - Does your family treat you differently than before?
  - Does your family treat you differently than your siblings (if applicable)?
  
3. How was your experience with healthcare?
  - What kind of specialists or doctors did you see? (surgeon, social worker, psychologist, etc.)
  - Which one of the people you mentioned helped you the most?
  - How did they help you?
  - Can you tell me about your pain?
  - Do doctors/nurses believe you when you tell them you're in pain?
  - Can you give me an example of something that happened where someone didn't believe you were in pain?
  - How does it make you feel when doctors/nurses don't believe you?
  - How do you feel when someone asks you to rate your pain on a scale of 1 to 10?
  - What do these numbers mean to you?

- What questions would you rather be asked to rate your pain?
4. How did you hear from curvy girls?
- How long have you been a member?
  - What did you think a meeting would be like?
  - How was it actually?
  - Can you name the top 3 things that CG has helped you with? (Hone in on each)
  - In a world with no limitations, what would you change to CG?
5. Other general questions:
- Age
  - Hobbies
  - Choice of pseudonym
